# Supplementary material for: The Assembly Process of Free-Living and Particle-Attached Bacterial Communities in Shrimp-Rearing Waters: The Overwhelming Influence of Nutrient Factors Relative to Microalgal Inoculation
Source: Animals (Basel). 2023 Nov 11;13(22):3484. doi: 10.3390/ani13223484 (PMC10668652; doi:10.3390/ani13223484)
Supplement: Supplementary file 1 [file animals-13-03484-s001.zip › animals-2646736-supplementary.pdf]

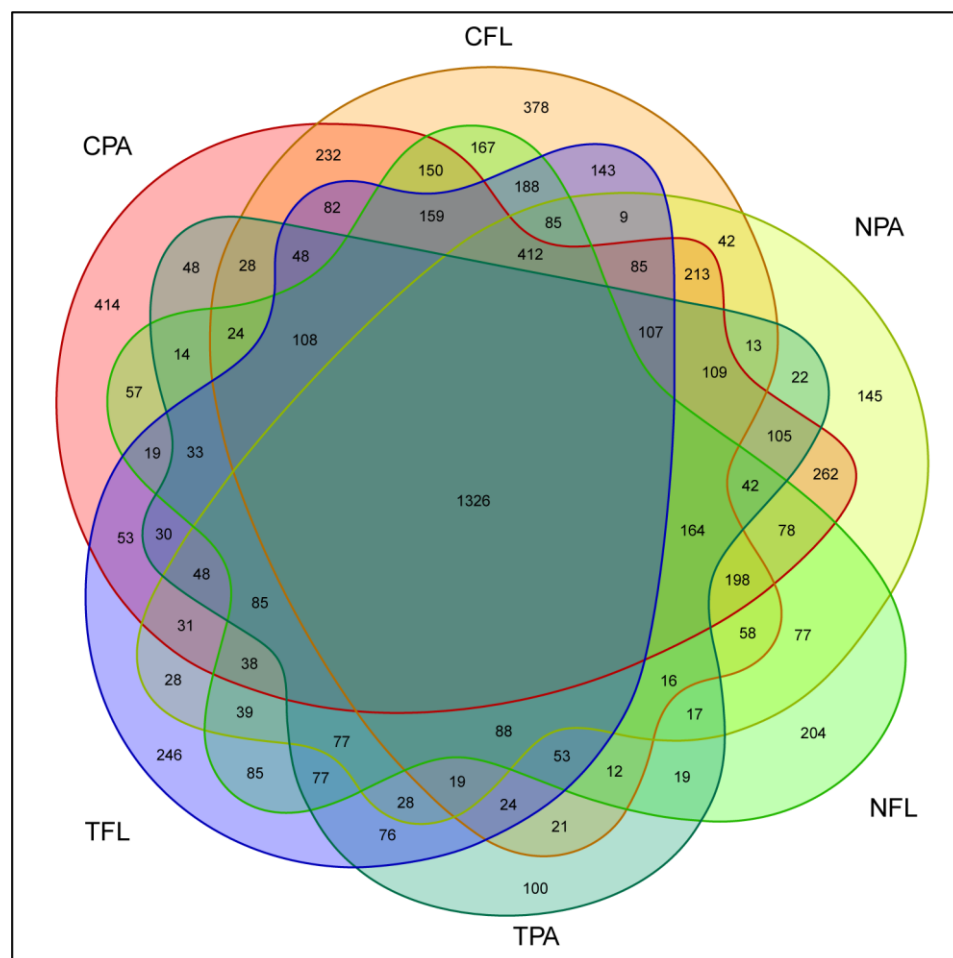

**Figure S1.** The number of ZOTUs in PA and FL bacterial communities among three groups.

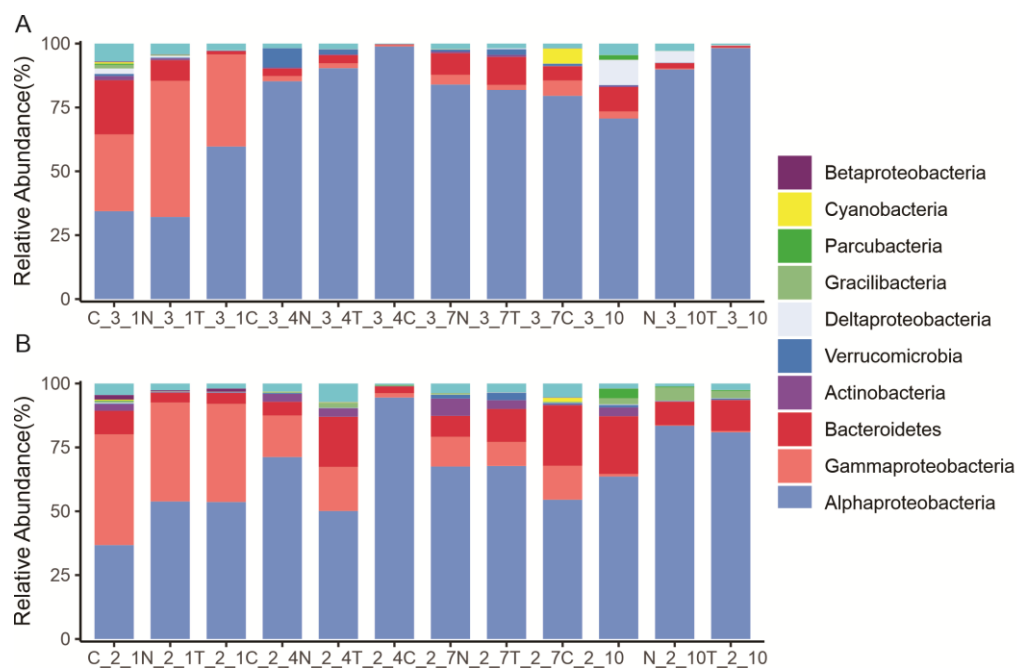

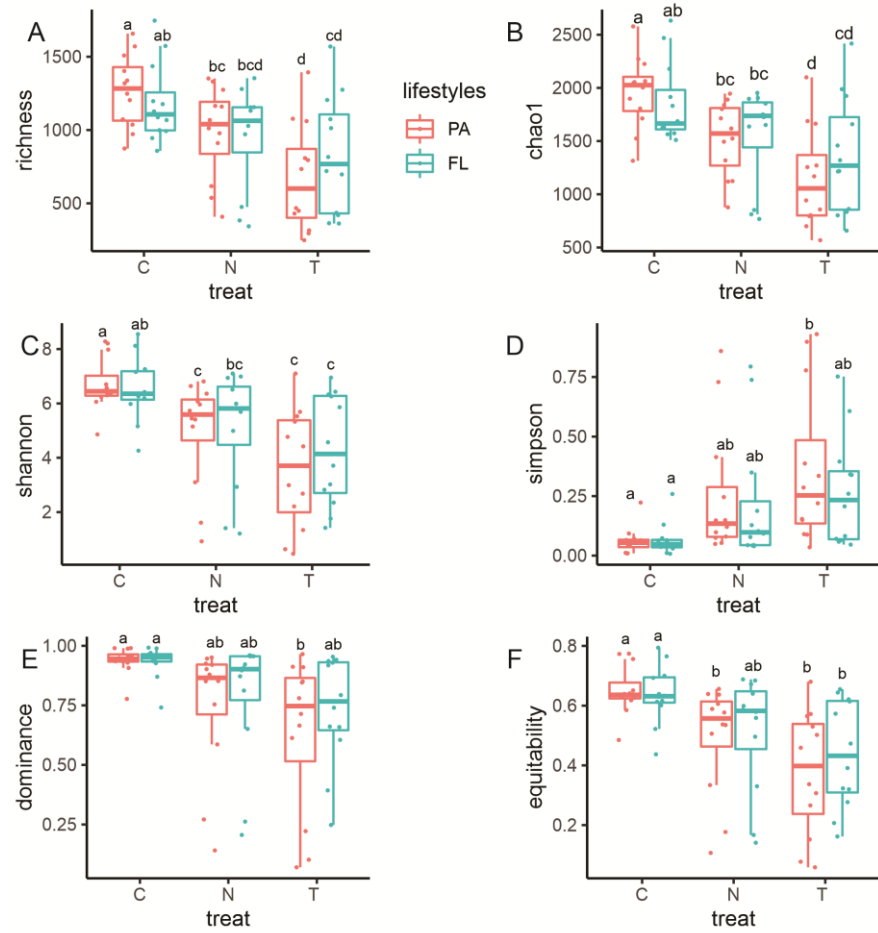

**Figure S3.** The  $\alpha$ -diversity indices of particle-attached (PA) and free-living (FL) bacterial communities in three groups. (A) richness, (B) Chao1, (C) Shannon, (D) Simpson, (E) dominance, and (F) equitability. Different lowercase letters denote significant differences ( $p < 0.05$ ) between rearing times based on one-way ANOVA.

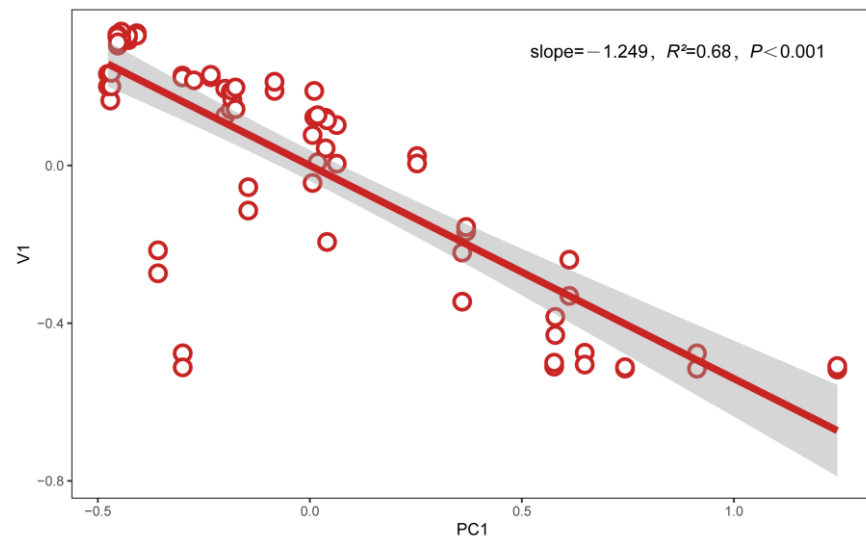

**Figure S4.** Regression analyses between the PCo 1 of PCoA and PC1 of PCA.

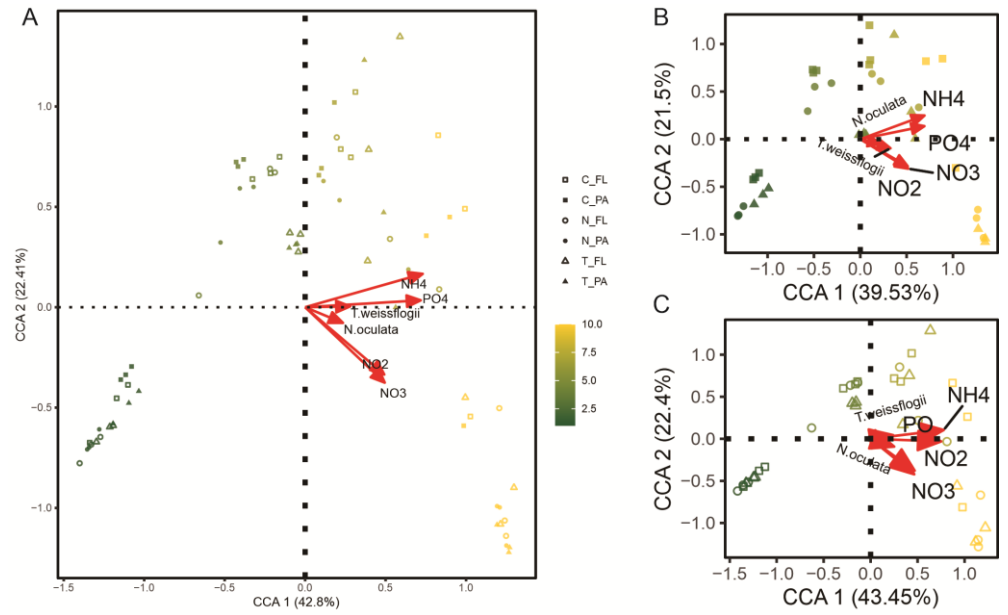

**Figure S5.** Driving effect of environment factors on whole (A), PA (B), and FL (C) bacterial communities visualized via canonical correspondence analysis (CCA).

**Table S1.** Spearman's correlation between the principal components (PC1 and PC2) of principal component analysis and environmental factors (nutrient and microalgal factors).

|     | PO <sub>4</sub> | NH <sub>4</sub> | NO <sub>2</sub> | NO <sub>3</sub> | <i>N. oculata</i> | <i>T. weissflogii</i> |
|-----|-----------------|-----------------|-----------------|-----------------|-------------------|-----------------------|
| PC1 | 0.974 ***       | 0.943 ***       | 0.654 ***       | 0.545 ***       | 0.358 **          | -0.156                |
| PC2 | 0.126           | 0.158           | 0.362 **        | 0.235 *         | -0.806 ***        | 0.720 ***             |

\*  $p < 0.05$ ; \*\*  $p < 0.01$ ; \*\*\*  $p < 0.001$ .

**Table S2.** Pairwise comparison of bacterial community of each group on the first day based on MRPP, ANOSIM, and Adonis.

|           | MRPP     |     | ANOSIM |     | Adonis   |     |
|-----------|----------|-----|--------|-----|----------|-----|
|           | $\delta$ | $p$ | $r$    | $P$ | F. Model | $p$ |
| C_PA/N_PA | 0.51     | 0.1 | 1      | 0.1 | 20.25    | 0.1 |
| C_PA/T_PA | 0.61     | 0.1 | 1      | 0.1 | 37.19    | 0.1 |
| N_PA/T_PA | 0.46     | 0.1 | 1      | 0.1 | 14.93    | 0.1 |
| C_FL/N_FL | 0.35     | 0.1 | 1      | 0.1 | 7.96     | 0.1 |
| C_FL/T_FL | 0.39     | 0.1 | 1      | 0.1 | 10.04    | 0.1 |
| N_FL/T_FL | 0.13     | 0.1 | 0.44   | 0.1 | 2.75     | 0.1 |

**Table S3.** Spearman's correlation between the principal components (PC1 and PC2) of principal component analysis and  $\alpha$ -diversity indices.

|     | Chao1    | Dominance  | Equitability | Richness  | Simpson   | Shannon    |
|-----|----------|------------|--------------|-----------|-----------|------------|
| PC1 | -0.241 * | -0.418 *** | -0.456 ***   | -0.320 ** | 0.417 *** | -0.429 *** |
| PC2 | -0.196   | -0.245 *   | -0.291 *     | -0.246 *  | 0.243 *   | -0.270 *   |

\*  $p < 0.05$ ; \*\*  $p < 0.01$ ; \*\*\*  $p < 0.001$ .
